# Supplementary material
Source: publisher site journal article supplement (https://www.dovepress.com/article/534411)
Supplement: Supplementary file 1 [file 534411-Supplementary.pdf]

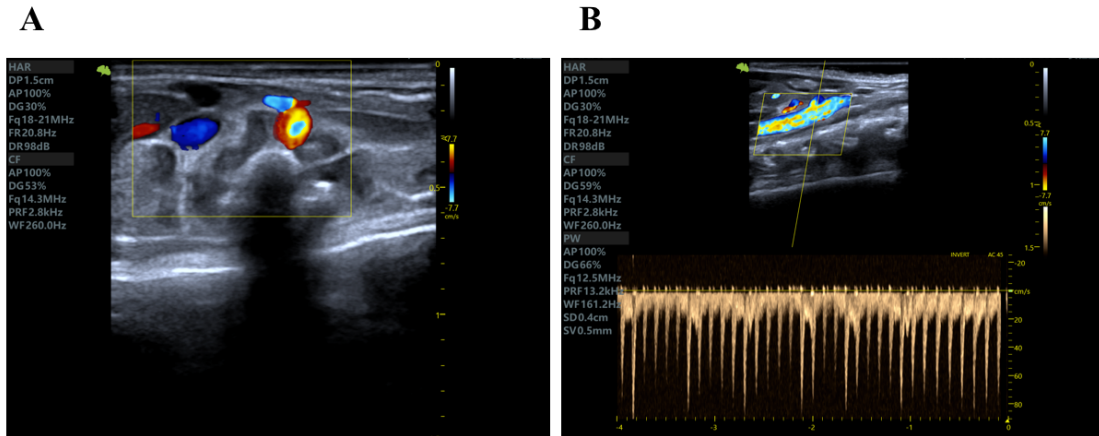

**Supplementary Figure 1. Ultrasonic identification and hemodynamic assessment of the inferior vena cava (IVC) and abdominal aorta (AA).**

(A) Color Doppler imaging distinguishing the IVC from the AA. The IVC exhibits slower, darker blood flow signals, while the AA displays brighter, pulsatile flow.

(B) Pulsed-wave (PW) Doppler confirming pulsatile arterial flow within the AA.

**A**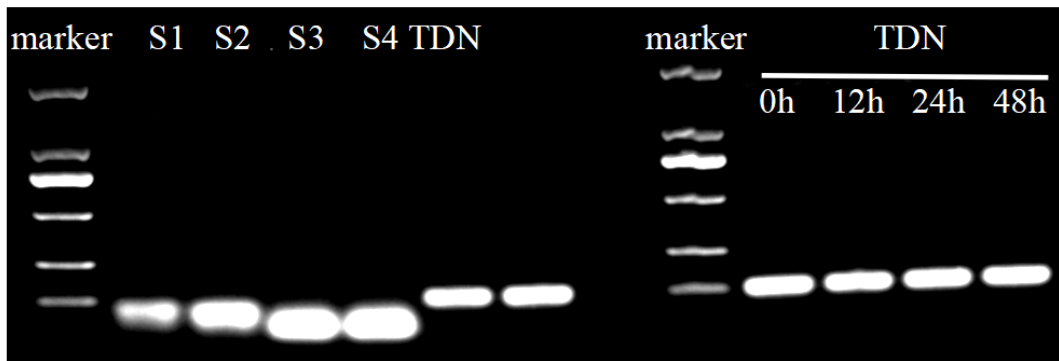**B**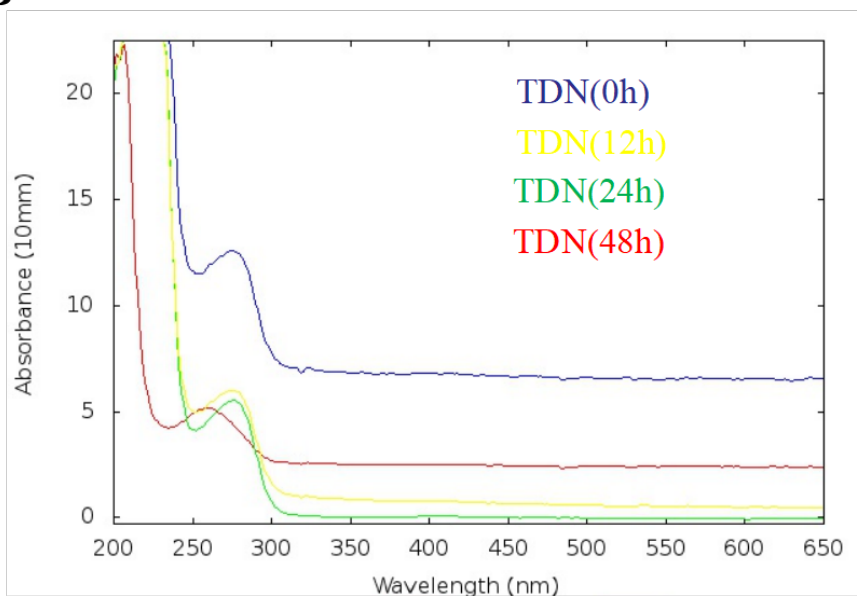**Supplementary Figure 2. Stability evaluation of TDNs under physiological conditions.**

TDNs were incubated in PBS at 37 °C with 10% FBS for up to 48 hours to simulate in vivo fluid environment.

(A) Agarose gel electrophoresis confirming successful synthesis of TDNs: four ssDNA strands (S1–S4, 1  $\mu$ M each) were annealed in TM buffer (10 mM Tris-HCl, 5 mM MgCl<sub>2</sub>, pH 8.0) by denaturation at 95°C for 10 min followed by rapid cooling to 4°C. Electrophoresis was performed at 120 V for 30 min.

(B) UV-Vis absorption spectra of TDNs: samples were measured using an Implen NanoPhotometer® N50 after incubation with serum for 0, 12, 24, and 48 h. A strong absorption peak was observed in the 250–300 nm range.

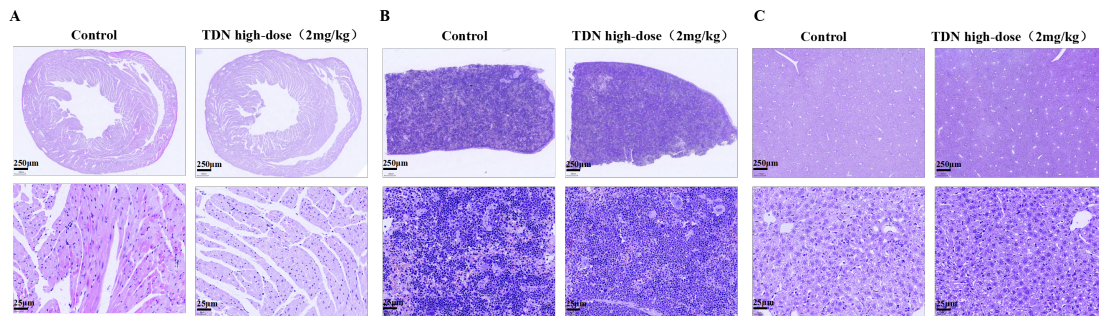

**Supplementary Figure 3. Histopathological assessment of major organ toxicity after TDN administration.**

Mice were treated with TDNs (2 mg/kg) via tail vein injection for 14 days. Organs were harvested, fixed, sectioned, and stained with H&E.

(A) Heart tissue. (B) Spleen tissue. (C) Liver tissue. No significant histological abnormalities were observed.

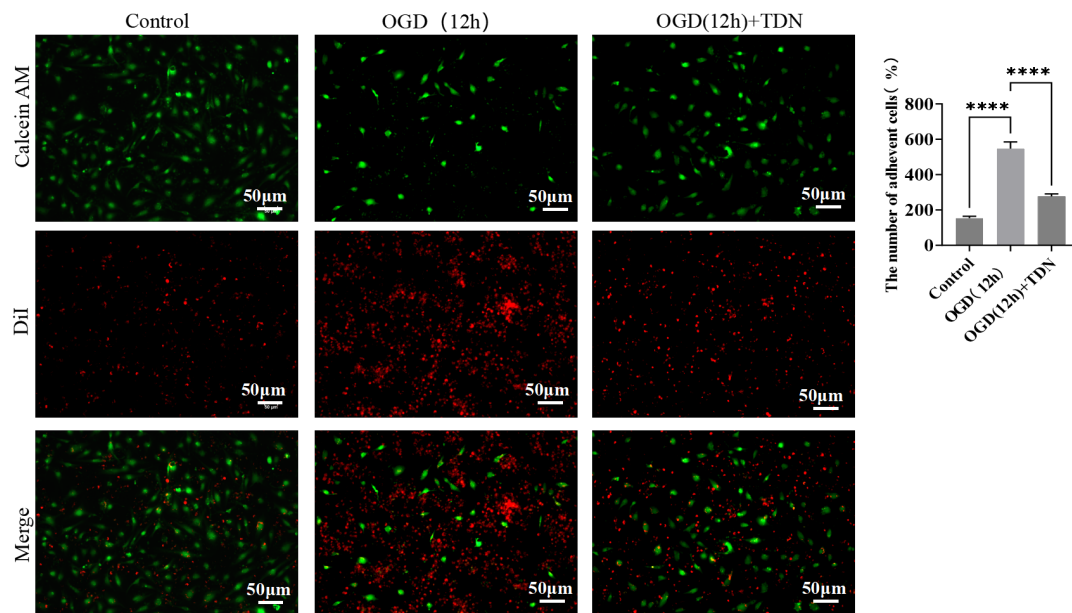

**Supplementary Figure 4. Evaluation of macrophage adhesion to endothelial cells under OGD/R conditions.**

Vascular endothelial cells were labeled with Calcein-AM (green) and subjected to OGD for 12 h, then co-cultured with DiI-labeled THP-1 macrophages (red).

The left panel shows representative fluorescence images of adhered THP-1 cells on endothelial monolayers. The right panel provides quantitative analysis of macrophage adhesion presented as the ratio of THP-1 cells to endothelial cells. Data are shown as mean  $\pm$  SEM; \*\*\*\* $p < 0.001$ .
